# Supplementary material for: Complexation of Eu(iii) with Cucurbit[n]uril, n = 5 and 7: A Thermodynamic and Structural Study
Source: Royal Society of Chemistry journal article supplement (doi:10.1039/c4dt03623a), 2015-01-01

1. ESI-MS spectra of Eu-CB7 at ligand to metal ratio 1.

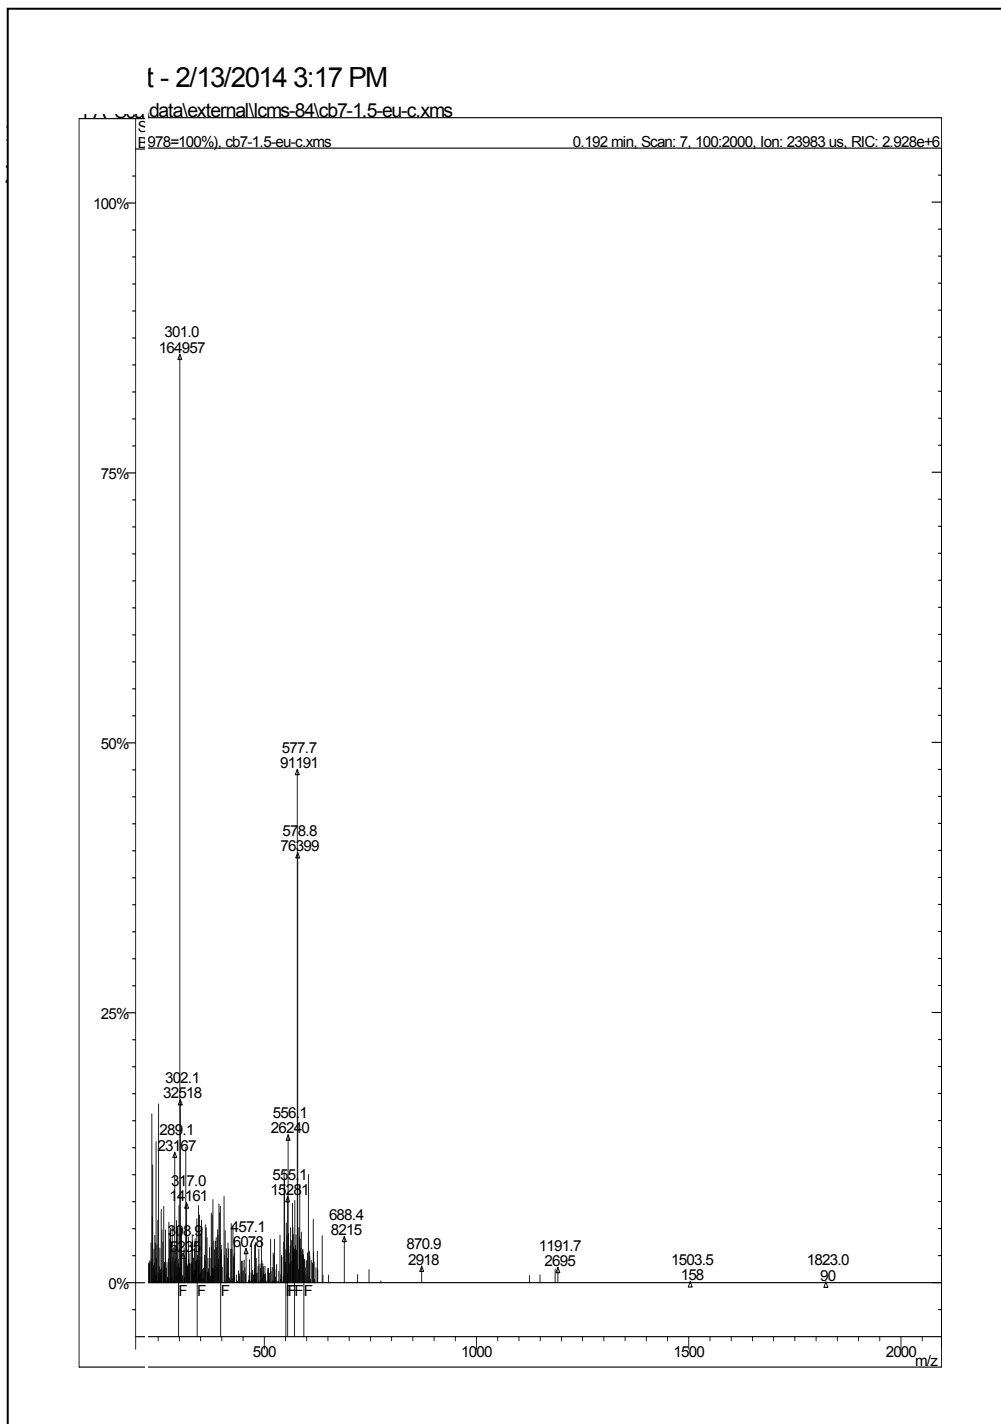

## 2. ESI-MS spectra of Eu-CB7 at ligand to metal ratio 5

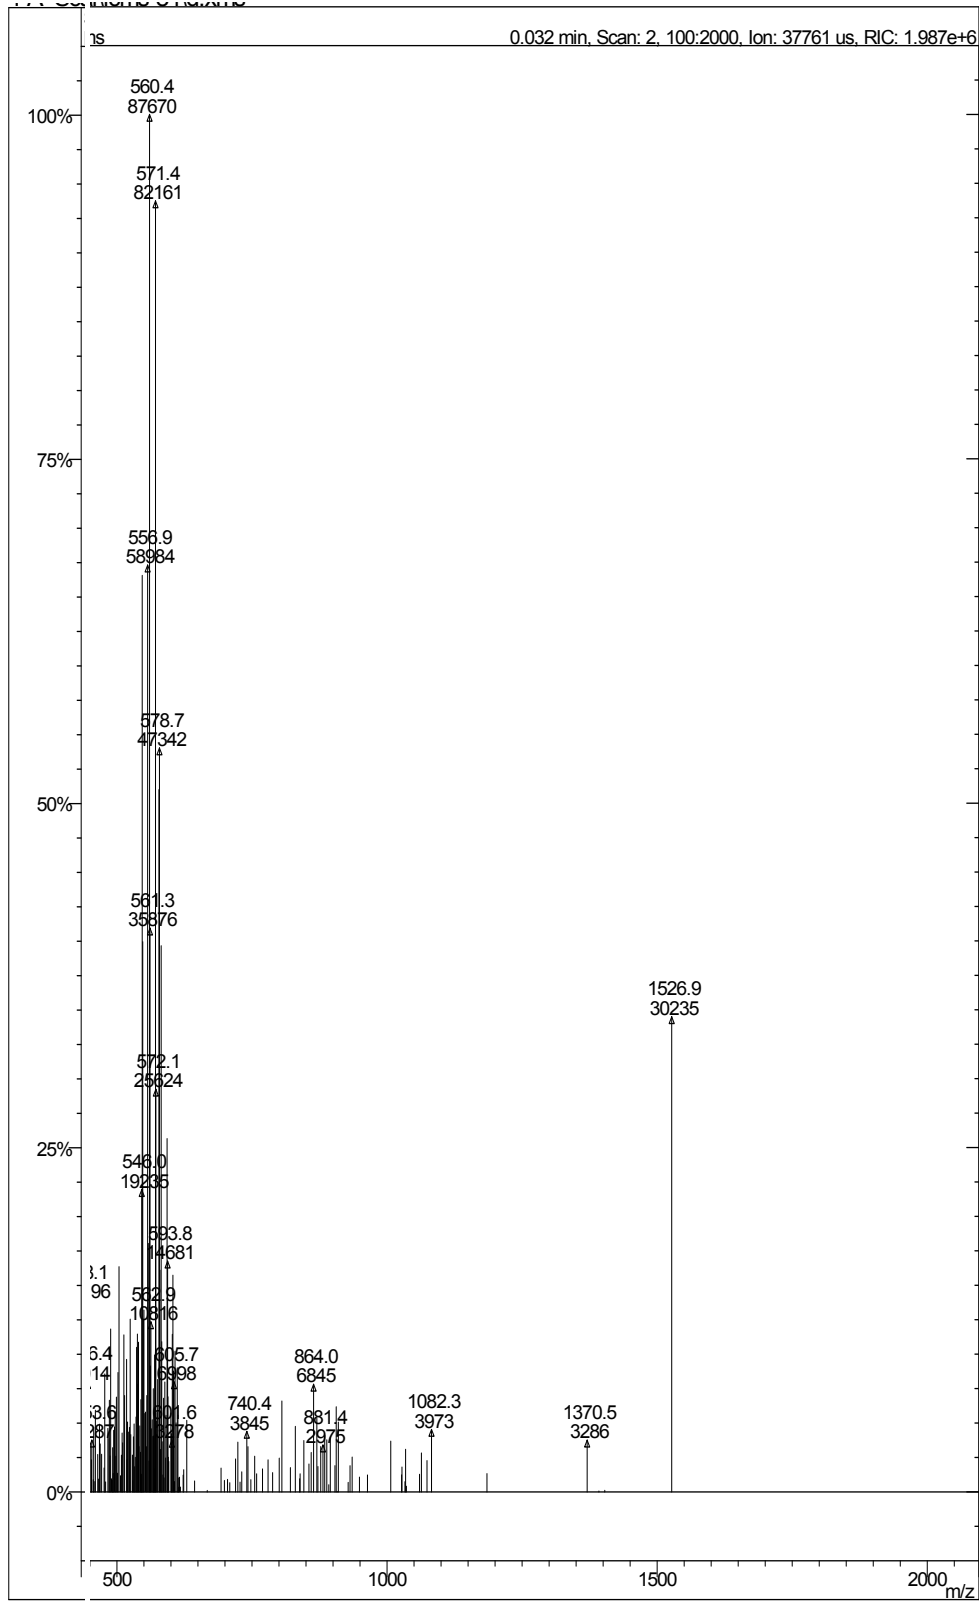

### 3. ESI-MS spectra of Eu-CB5 at ligand to metal ratio 5

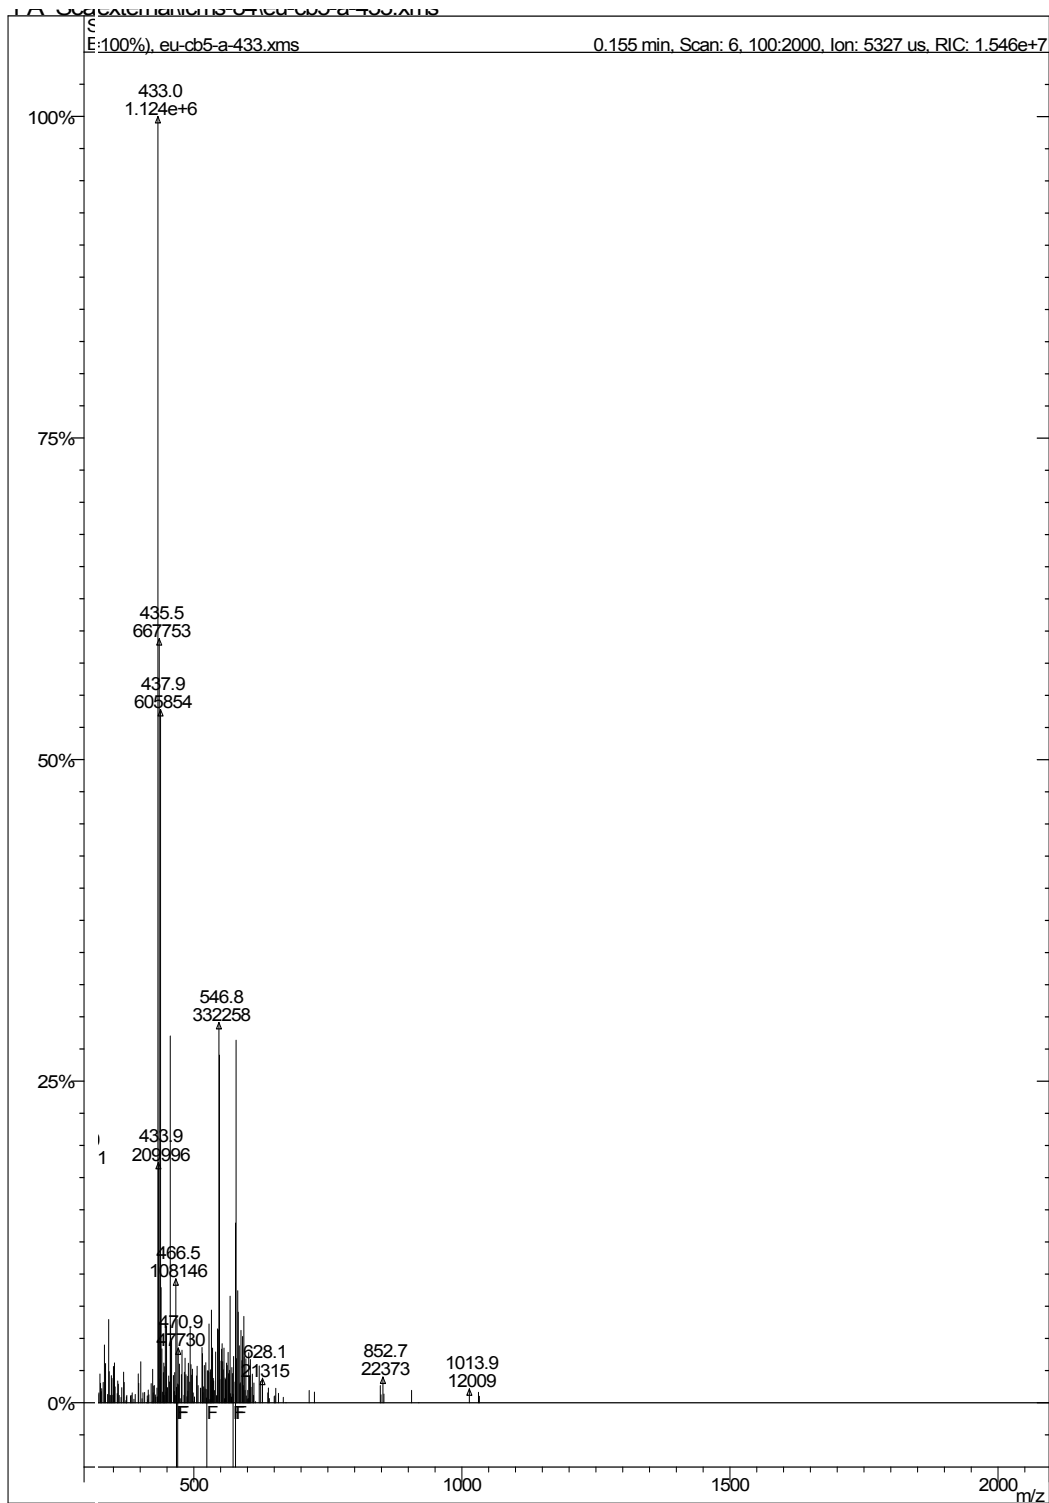

4. Optimised structure of CB5 describing  $R_i$  (Europium atom (green), Oxygen atom (red), Hydrogen atom (blue), Nitrogen atom (purple) and Carbon (yellow))

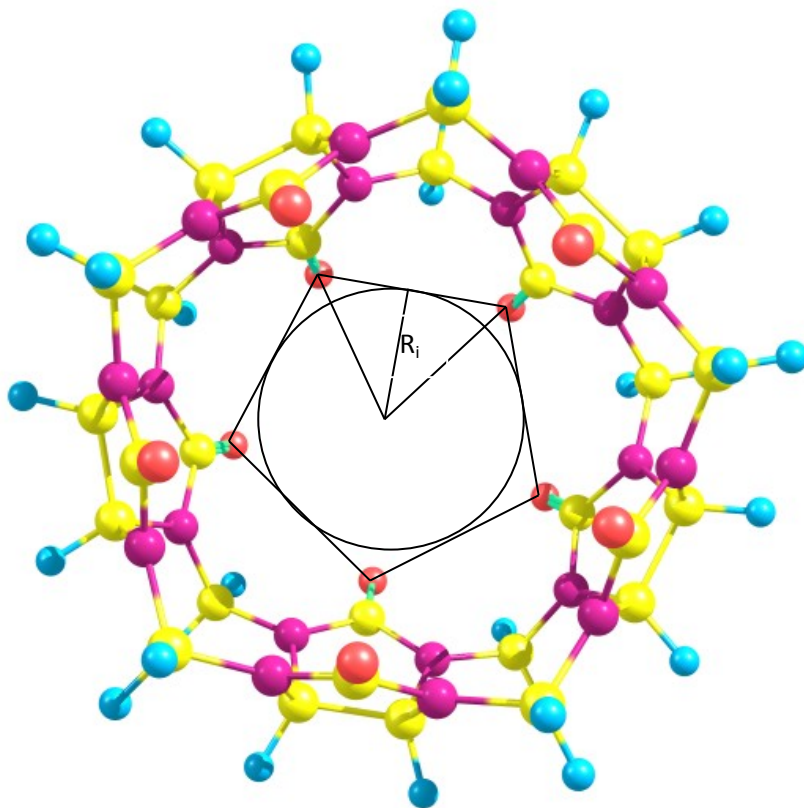

5. **Optimized structure of Eu(III)CB5(H<sub>2</sub>O)<sub>3</sub> in two different geometries (Europium atom (green), Oxygen atom (red), Hydrogen atom (blue), Nitrogen atom (purple) and Carbon (yellow))**

- i) Out of three water molecules coordinated to Eu(III), one water molecule encapsulated in the cavity and two water molecules are coordinated from outside (Eu-CB5 A)

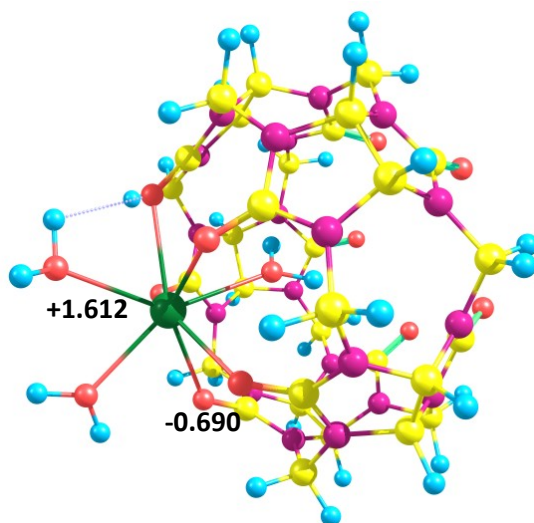

- ii) All the three water molecules are coordinated to Eu(III) from outside (Eu-CB5 B)

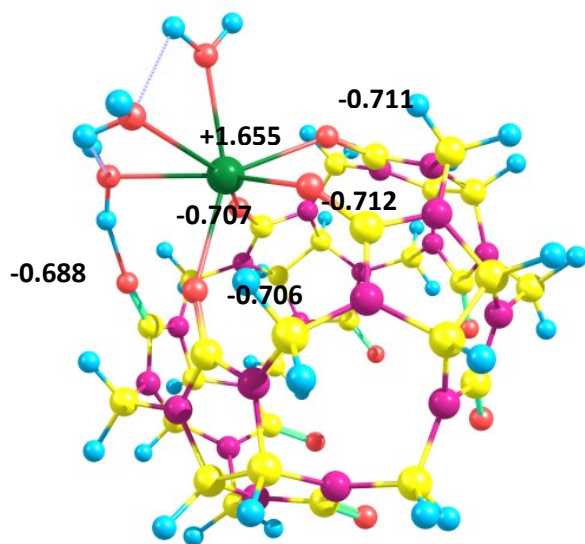

Supplement: c4dt03623a1.pdf [file c4dt03623a1.pdf]
